# Supplementary material for: Impact of LDLR polymorphisms on lipid levels and atorvastatin’s efficacy in a northern Chinese adult Han cohort with dyslipidemia
Source: PubMed Central journal article supplement (PMC11016223; doi:10.1186/s12944-024-02101-4), 2024-04-14
Supplement: 12944_2024_2101_MOESM4_ESM.pdf [file 12944_2024_2101_MOESM4_ESM.pdf]

# Impact of LDLR Polymorphisms on Lipid Levels and Atorvastatin Efficacy in a Northern Chinese Adult Han Cohort with Dyslipidemia

*By Yan Tian*

1 **Impact of LDLR Polymorphisms on Lipid Levels and Atorvastatin's Efficacy in**  
2 **a Northern Chinese Adult Han Cohort with Dyslipidemia**

3 Hong-Liang Zhao<sup>1\*</sup>, Yang You<sup>1\*</sup>, Yan Tian<sup>2\*</sup>, Luyan Wang<sup>5</sup>, Yongqiang An<sup>1</sup>, Guoqiang  
4 Zhang<sup>2</sup>, Chang Shu<sup>3</sup>, Mingxin Yu<sup>2</sup>, Yihua Zhu<sup>2,4</sup>, Qian Li<sup>2</sup>, Yanwei Zhang<sup>2</sup>, Ningling  
5 Sun<sup>5†</sup>, Songnian Hu<sup>3,6†</sup>, Gang Liu<sup>1†</sup>

6

7 <sup>1</sup> Department of Cardiology, The First Hospital of Hebei Medical University,

8 Shijiazhuang, Hebei, China;

9 <sup>2</sup> Beijing E-Seq Medical Technology Co. Ltd., Beijing, China;

10 <sup>3</sup> State Key Laboratory of Microbial Resources, Institute of Microbiology, Chinese

11 Academy of Sciences, Beijing, China;

12 <sup>4</sup> College of Information Science and Technology, Nanjing Agricultural University,

13 Nanjing, Jiangsu Province, China;

14 <sup>5</sup> Institute of Hypertension, People's Hospital, Peking University, Beijing, China;

15 <sup>6</sup> University of Chinese Academy of Sciences, Beijing, China.

16

17 Gang Liu <https://orcid.org/0000-0003-1221-3698>

18 Hong-Liang Zhao <https://orcid.org/0000-0002-1331-8515>

19

20 \*These authors contributed equally and are co-first authors.

21 †These authors contributed equally and are corresponding authors.

22

23 Correspondence: Gang Liu ([cardio2004@hebmu.edu.cn](mailto:cardio2004@hebmu.edu.cn)), Songnian Hu

24 ([husn@im.ac.cn](mailto:husn@im.ac.cn)), Ningling Sun ([sunnl@263.net](mailto:sunnl@263.net))

25

## 26 **Abstract**

### 27 **Background**

28 Dyslipidemia, a significant risk factor for atherosclerotic cardiovascular disease

29 (ASCVD), is influenced by genetic variations, particularly those in the low-density

30 lipoprotein receptor (LDLR) gene. This study aimed to elucidate the effects of LDLR

31 polymorphisms on baseline serum lipid levels and the therapeutic efficacy of

32 atorvastatin in an adult Han population in northern China with dyslipidemia.

### 33 **Methods**

34 In this study, 255 Han Chinese adults receiving atorvastatin therapy were examined

35 and followed up. The 3' untranslated region (UTR) of the LDLR gene was sequenced

36 to identify polymorphisms. The associations between gene polymorphisms and serum

37 lipid levels, as well as changes in lipid levels after intervention, were evaluated using

38 the Wilcoxon rank sum test, with a  $P < 0.05$  indicating statistical significance.

39 Assessment of linkage disequilibrium patterns and haplotype structures was

40 conducted utilizing Haploview.

### 41 **Results**

42 Eleven distinct polymorphisms at LDLR 3' UTR were identified. Seven

43 polymorphisms (rs1433099, rs14158, rs2738466, rs5742911, rs17249057,

44 rs55971831, and rs568219285) were correlated with the baseline serum lipid levels

45 ( $P<0.05$ ). In particular, four polymorphisms (rs14158, rs2738466, rs5742911, and  
46 rs17249057) were in strong linkage disequilibrium ( $r^2=1$ ), and patients with the  
47 AGGC haplotype had higher TC and LDL-C levels at baseline. Three polymorphisms  
48 (rs1433099, rs2738467, and rs7254521) were correlated with the therapeutic efficacy  
49 of atorvastatin ( $P<0.05$ ). Furthermore, carriers of the rs2738467 T allele demonstrated  
50 a significantly greater reduction in low-density lipoprotein cholesterol (LDL-C) levels  
51 post-atorvastatin treatment ( $P=0.03$ ), indicating a potentially crucial genetic influence  
52 on therapeutic outcomes. Two polymorphisms (rs751672818 and rs566918949) were  
53 neither correlated with the baseline serum lipid levels nor atorvastatin's efficacy.

#### 54 **Conclusions**

55 This research outlined the complex genetic architecture surrounding LDLR 3' UTR  
56 polymorphisms and their role in lipid metabolism and the response to atorvastatin  
57 treatment in adult Han Chinese patients with dyslipidemia, highlighting the  
58 importance of genetic profiling in enhancing tailored therapeutic strategies.  
59 Furthermore, this investigation advocates for the integration of genetic testing into the  
60 management of dyslipidemia, paving the way for customized therapeutic approaches  
61 that could significantly improve patient care.

#### 62 **Keywords**

63 Pharmacogenetics, LDLR polymorphisms, Atorvastatin, Dyslipidemia, Han Chinese

#### 64 **Trial registration**

65 This multicenter study was approved by the Ethics Committee of Xiangya Hospital  
66 Central South University (ethics number K22144). It was a general ethic. In addition,

67 this study was approved by The First Hospital of Hebei Medical University (ethics  
68 number 20220418).

69

## 70 **Background**

71 Dyslipidemia, characterized by abnormal lipid levels, emerges from complex  
72 interactions among genetics, lifestyle factors, metabolic stress, and autophagy [1-7].  
73 Dyslipidemia is a major risk factor for atherosclerotic cardiovascular disease  
74 (ASCVD) which is the leading cause of death among Chinese urban and rural  
75 residents, and it accounts for more than 40% of deaths [8]. Epidemiological, genetic,  
76 and clinical intervention studies have identified low-density lipoprotein cholesterol  
77 (LDL-C) as a causal factor in ASCVD [9].

78 Statins, widely used to manage dyslipidemia, primarily mitigate ASCVD risk by  
79 effectively lowering LDL-C levels [10-12]. Despite widespread statin use, response  
80 varies due to multiple factors, including variations at the low-density lipoprotein  
81 receptor (LDLR) [13-15]. Numerous studies [16-39] have focused primarily on  
82 patients with familial hypercholesterolemia (FH) and have mostly examined coding  
83 regions and promoters of the LDLR gene. However, polymorphisms in the LDLR 3'  
84 UTR have seldom been reported in the context of patients with dyslipidemia. A recent  
85 study revealed that variations in the LDLR 3' UTR interfere with miRNA: mRNA  
86 interactions, which may impact gene expression and could be linked to FH [40].

87 This study investigated the impact of LDLR 3' UTR polymorphisms on lipid levels  
88 before and after atorvastatin treatment in adult Chinese Han patients with

89 dyslipidemia, offering significant insights into the genetic factors influencing serum  
90 lipid regulation and the potential effects on atorvastatin treatment outcomes. On one  
91 hand, this study provides an evidence for screening potential dyslipidemia population;  
92 on the other, it could help to identify the patients who benefit the most from taking  
93 atorvastatin, providing a strong guidance for clinical individualized precision  
94 treatment.

95

## 96 **Methods**

### 97 **Study Population**

98 This study enrolled 255 adult Chinese Han patients admitted to The First Hospital of  
99 Hebei Medical University between June 2022 and July 2023. All participants were  
100 prescribed a daily 20 mg dose of atorvastatin and underwent quarterly follow-up  
101 evaluations conducted by a skilled investigative team. Written informed consent  
102 confirming voluntary participation was obtained from each patient. This multicenter  
103 study was approved by the Ethics Committee of Xiangya Hospital Central South  
104 University (ethics number K22144). Ethical approval was also obtained from The  
105 First Hospital of Hebei Medical University (20220418).

### 106 **Data Collection**

107 Baseline demographic characteristics, such as sex and age, were collected via  
108 interviews using a uniform questionnaire administered by trained researchers.  
109 Measurements of height and weight were taken at the nurse's station by experienced  
110 nurses, and the body mass index (BMI) was determined by dividing the weight (in

111 kilograms) by the square of the height (in meters). The blood of the participants was  
112 drawn from the antecubital vein in a fasting state by skilled nurses to measure  
113 triglyceride (TG), total cholesterol (TC), LDL-C, and high-density lipoprotein  
114 cholesterol (HDL-C) levels. All clinical investigations were conducted in accordance  
115 with the principles of the Declaration of Helsinki. At each follow-up, TG, TC, LDL-C  
116 and HDL-C levels were measured.

### 117 **DNA Sequencing**

118 From each enrolled patient, 2 ml of peripheral venous blood was collected for  
119 genomic DNA extraction using the Magnetic Blood Genomic DNA Kit (DP329,  
120 Tiangen Biotech Co., Ltd., Beijing, China). The DNA concentration was quantified  
121 with the Qubit® dsDNA HS Assay Kit (Yeasen Biotechnology Co., Ltd, Shanghai,  
122 China) according to the manufacturer's protocol. The DNBSEQ-T7 sequencer (MGI  
123 Tech Co., Ltd, Shenzhen, China) was used for high-throughput sequencing of the  
124 DNA captured from a pharmacogenetics panel with reads of 150 bp in length.

### 125 **SNP Calling and Genotyping**

126 High-quality sequencing reads were derived by filtering out adapters, unknown bases,  
127 and low-quality bases with Trimmomatic (v0.36) [41]. The high-quality reads were  
128 aligned to the human reference genome hg19 using the Burrows-Wheeler Aligner  
129 (BWA, v0.7.15) with the default parameters [42]. The Genome Analysis Toolkit  
130 (GATK, v3.8) was used for indel realignment, quality score recalibration,  
131 polymorphism calling, and genotyping (using Haplotype Caller) [43].

### 132 **Statistical Analysis**

133 Changes in serum lipid levels were quantified by calculating the difference from  
134 baseline to follow-up. The  $\Delta\%$ TG,  $\Delta\%$ TC,  $\Delta\%$ LDL-C, and  $\Delta\%$ HDL-C, represented  
135 the percentage changes in TG, TC, LDL-C and HDL-C, respectively. Associations  
136 between gene polymorphisms and serum lipid levels, including changes post-  
137 intervention, were evaluated with the Wilcoxon rank sum test. A *P* threshold of less  
138 than 0.05 indicated statistical significance. Assessment of linkage disequilibrium  
139 patterns and haplotype structures was conducted using Haploview software [44].

140

## 141 Results

### 142 Baseline Characteristics of the Study Cohort

143 The baseline demographics of the 255 study participants are outlined in Table 1. The  
144 cohort predominantly comprised males (approximately 69%), and the majority of  
145 patients (over 78%) were aged between 50 and 80 years. A significant proportion of  
146 the patients (more than 70%) had a BMI greater than 24 kg/m<sup>2</sup>.

147 **Table 1 Baseline characteristics of the patients in this study**

| Characteristics |        | All patients (n = 255) |
|-----------------|--------|------------------------|
| Sex             | Male   | 177 (69.41%)           |
|                 | Female | 78 (30.59%)            |
| Age, years      | 20~29  | 2 (0.78%)              |
|                 | 30~39  | 12 (4.71%)             |
|                 | 40~49  | 27 (10.59%)            |
|                 | 50~59  | 62 (24.31%)            |



|                        |         |              |
|------------------------|---------|--------------|
|                        | 60~69   | 75 (29.41%)  |
|                        | 70~79   | 63 (24.71%)  |
|                        | >=80    | 14 (5.49%)   |
| BMI, kg/m <sup>2</sup> | <18.5   | 3 (1.18%)    |
|                        | 18.5~24 | 73 (28.63%)  |
|                        | 24~28   | 120 (47.06%) |
|                        | >=28    | 59 (23.14%)  |

---

148 Note: Values are presented as numbers (percentages).

#### 149 **Distribution and Frequency of LDLR Polymorphisms**

150 Eleven distinct LDLR polymorphisms within the 3' UTR were identified across the  
151 study population, as detailed in Figure 1 and Supplemental Table 1. The  
152 polymorphisms rs14158, rs2738466, rs5742911, and rs17249057 were identified  
153 concurrently in 255 patients, indicating an inheritance pattern. The genotype  
154 distribution for these four polymorphisms was that 94 patients (36.86%) were wild,  
155 125 (49.02%) were heterozygous, and 36 (14.12%) were homozygous. The rs1433099  
156 mutant allele was common, occurring in heterozygosity in 38.04% and in  
157 homozygosity in 53.73% of patients. The rs2738467 mutant allele was found in  
158 heterozygous form in 25.88% of patients and in homozygous form in 2.75% of  
159 patients. The rs55971831 mutant allele was present in 26.67% of patients, all of  
160 whom were heterozygous for the mutation. The rs751672818 mutant allele occurred  
161 in 3.53% of patients, exclusively in heterozygous form. The mutant alleles of  
162 rs568219285, rs7254521, and rs566918949 were rare, being detected in only one or

163 two individuals.

164 The identified polymorphisms, especially those exhibiting multiple genotype  
165 occurrences, warrant further investigation as potential markers for dyslipidemia in the  
166 Chinese population.

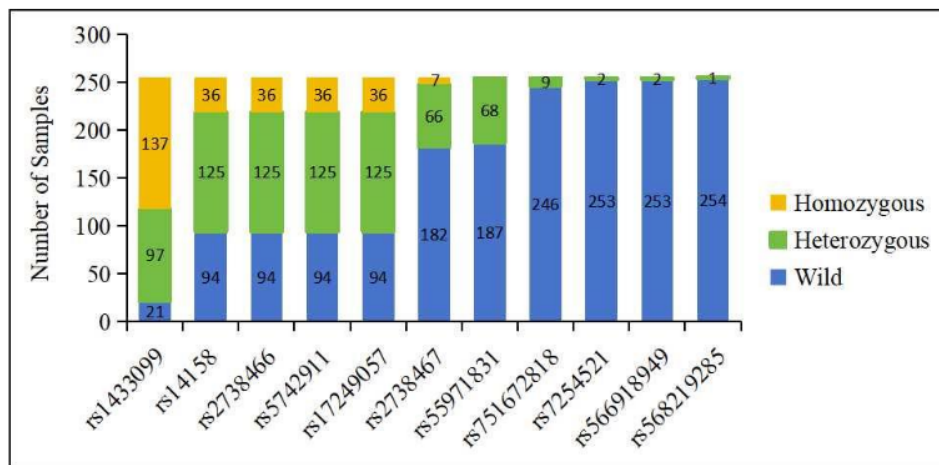

167

168 **Figure 1 Polymorphisms in the LDLR 3' UTR identified in this study**

168

169

### 170 **Comparison of Allele Frequencies to those in Public Databases**

171 The allele frequencies (AFs) of the identified polymorphisms were compared with  
172 those reported in public genomic databases, as detailed in Figure 2 and Supplemental  
173 Table 2. Except for rs55971831, the AFs of the other ten identified polymorphisms  
174 closely matched those observed in East Asian populations within the August 2015  
175 release of the 1000 Genomes Project (1000g2015aug) and the Genome Aggregation  
176 Database (gnomAD). The AF for rs55971831 was 0.13 in this cohort, lower than that  
177 reported for East Asian populations in both 1000g2015aug and gnomAD. The AFs for  
178 rs14158, rs2738466, rs5742911, and rs17249057 were 0.39 in this study. They were

179 slightly lower than the highest recorded AF of 0.41 in East Asian populations, but  
180 significantly higher than the AFs observed in American (ranging from 0.21 to 0.29)  
181 and African populations (ranging from 0.15 to 0.19). This disparity in AFs suggests a  
182 genetic predisposition within the Chinese population for these specific LDLR  
183 polymorphisms, underscoring their potential as markers of dyslipidemia in this ethnic  
184 group. The AF of rs1433099 was observed to be 0.73 in this study. In contrast, in the  
185 1000g2015aug and gnomAD databases, the AF was reported at 0.79 in American  
186 populations, and it ranged between 0.38 and 0.46 in African populations. This  
187 indicates that rs1433099 is a common polymorphism across different ethnicities. The  
188 AF for rs2738467 was 0.16 in this study, and it was 0.40 to 0.47 in American  
189 populations and 0.03 to 0.08 in African populations. This significant variation  
190 indicates that the rs2738467 polymorphism exhibits considerable diversity in different  
191 populations. The AF of rs7254521 was 0.004 in this study, and this value was  
192 0.003~0.132 in the East Asian population in the public database. However, the AF of  
193 rs7254521 was 0.08 in the American population, and approximately 0.15 in the  
194 African population. This indicates that rs7254521 has a high ethnic diversity. The  
195 polymorphisms rs751672818, rs566918949, and rs568219285 exhibited low AFs in  
196 all populations studied, each being less than 0.02. This suggests that these are rare  
197 polymorphisms.

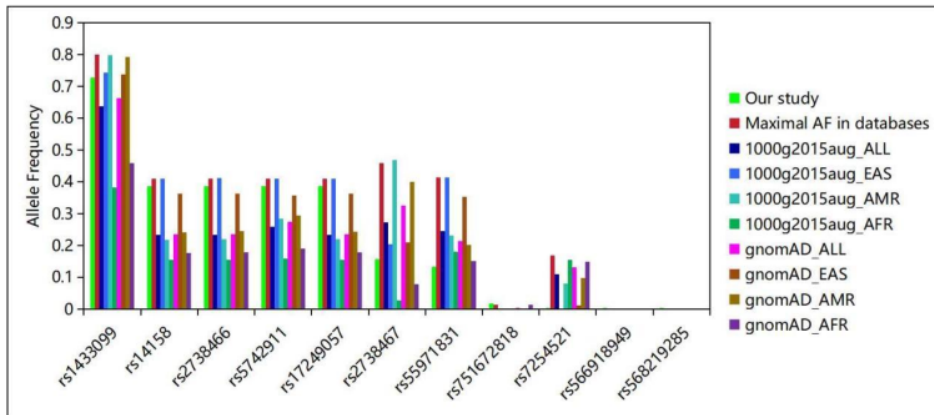

198

199 **Figure 2 The AFs of the identified polymorphisms in this study and public**  
 200 **databases**

201 1000g2015aug: August 2015 release of the 1000 Genomes Project, gnomAD:  
 202 Genome Aggregation Database, All: All populations, EAS: East Asian, AMR:  
 203 American, AFR: African.

204

205 **Linkage Disequilibrium and Haplotype Analysis**

206 The polymorphisms rs14158, rs2738466, rs5742911, and rs17249057, cooccurring in  
 207 patients, were subjected to linkage disequilibrium analysis. The results, depicted in  
 208 Figure 3, revealed strong linkage disequilibrium among these polymorphisms ( $r^2=1$ ).

209 The identified haplotypes, GAAT and AGGC, had population allele frequencies of  
 210 0.614 and 0.386, respectively, in this study cohort.

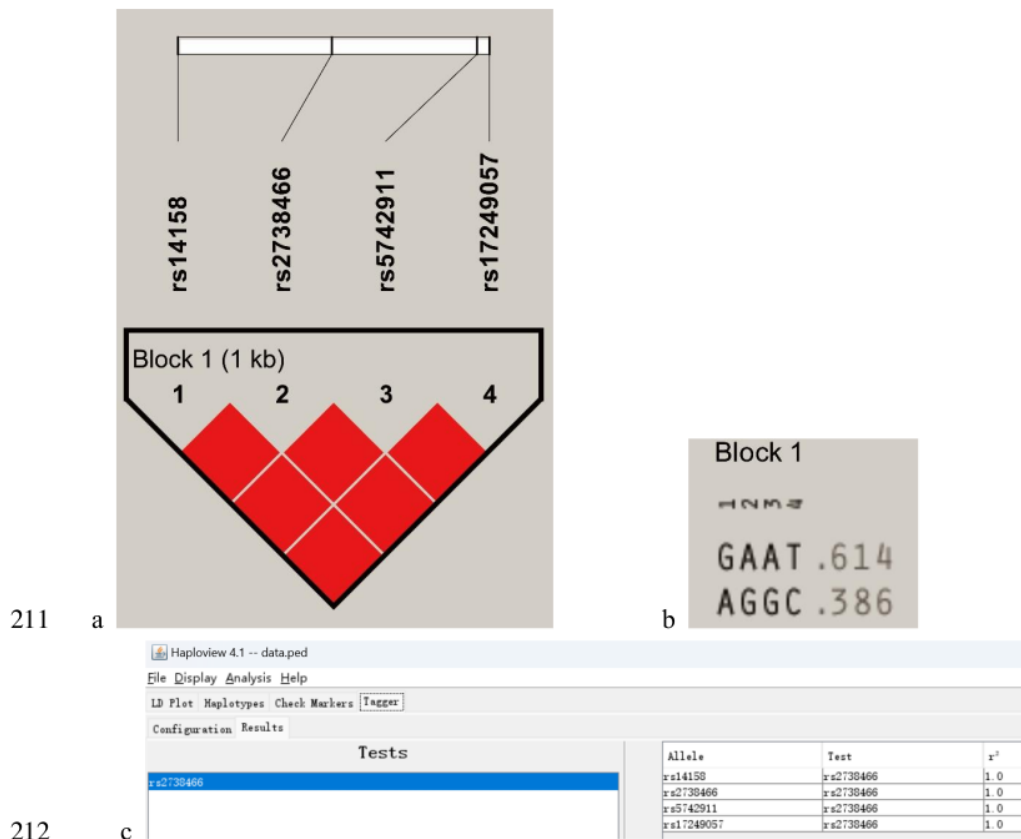

213 **Figure 3 Linkage disequilibrium of LDLR polymorphisms and haplotypes**

214

215 **Impact of LDLR Polymorphisms on Serum Lipid Levels at Enrollment**

216 The impact of identified polymorphisms on serum lipid levels at enrollment was

217 assessed, with findings summarized in Table 2. Significant associations were observed

218 between polymorphisms rs14158, rs2738466, rs5742911, and rs17249057 and

219 baseline levels of TC and LDL-C ( $P < 0.05$ ). Individuals carrying the A allele of

220 rs14158, the G allele of rs2738466, the G allele of rs5742911, and the C allele of

221 rs17249057 displayed elevated TC and LDL-C levels compared to carriers of

222 alternative alleles. This indicates that such polymorphisms, especially when inherited

223 as a haplotype, could impact LDL-C metabolism. A recent study [40] showed that  
224 rs5742911 enhances or <sup>7</sup>creates a binding site for three miRNAs (miR-3190-5p, miR-  
225 4435, and miR-4717-5p) and disrupts a binding site for miR-1587-5p, influencing  
226 gene expression and potentially contributing to FH, underscoring the significance of  
227 the findings in this study. Polymorphism rs1433099 was strongly associated with  
228 baseline TC and LDL-C levels ( $P<0.05$ ). Those who carry the C allele had higher  
229 levels of TC and LDL-C. Polymorphism rs55971831 was significantly associated  
230 with TG levels ( $P=0.002$ ), carriers of the A allele exhibiting higher TG levels than  
231 those with the C allele. Polymorphism rs568219285 exhibited a significant correlation  
232 with baseline TG and TC levels ( $P<0.05$ ). However, due to its rarity, further validation  
233 in a larger cohort is necessary. No significant correlations were observed between  
234 polymorphisms rs2738467, rs751672818, rs7254521, or rs566918949 and baseline  
235 serum lipid levels.

### 236 **Influence of of LDLR Polymorphisms on Atorvastatin Treatment Efficacy**

237 The relationship between LDLR polymorphisms and the relative change in serum  
238 lipid levels after atorvastatin therapy was evaluated and was showed in Table 3.  
239 Participants carrying the rs2738467 T allele showed a more significant reduction in  
240 TC, LDL-C, and HDL-C levels than did those with the C allele ( $P<0.05$ ). This novel  
241 discovery suggests that the rs2738467 T allele might augment the cholesterol-  
242 lowering efficacy of atorvastatin. The relative changes in lipid levels in patients with  
243 different genotypes at locus rs2738467 after atorvastatin therapy were shown in  
244 Figure 4. TC and LDL-C levels reduced 20% in patients carrying the rs2738467 T

245 allele and 10% in those with the C allele. Although HDL-C levels also decreased in  
246 patients with the rs2738467 T allele, the median change was under 5%, with some  
247 patients even experiencing an increase in HDL-C levels. This suggests that the  
248 rs2738467 T allele may specifically enhance atorvastatin's efficacy in lowering LDL-  
249 C levels. The rs1433099 showed a significant correlation with change in HDL-C  
250 levels post-atorvastatin treatment ( $P=0.02$ ). Although patients carrying the rs1433099  
251 C allele presented with greater TC and LDL-C levels at baseline, they showed a  
252 greater improvement in HDL-C levels following atorvastatin treatment. The  
253 rs7254521 was strongly associated with LDL-C levels post-atorvastatin treatment  
254 ( $P=0.03$ ); however, this observation was limited to only two patients. Verification in  
255 larger cohorts is necessary in future studies. No significant correlations were observed  
256 between polymorphisms rs14158, rs2738466, rs5742911, rs17249057, rs55971831,  
257 rs751672818, rs566918949, or rs568219285 and atorvastatin's efficacy.

258

259

Table 2 The correlation between LDLR polymorphisms and serum lipid levels at enrollment

| rsID        | gDNA_coordinate      | wild/mutant<br>(patients) | P                       |                           |                         |                           |                            |                              |                            |                              |  |  |
|-------------|----------------------|---------------------------|-------------------------|---------------------------|-------------------------|---------------------------|----------------------------|------------------------------|----------------------------|------------------------------|--|--|
|             |                      |                           | TG<br>(wild<br>greater) | TG<br>(mutant<br>greater) | TC<br>(wild<br>greater) | TC<br>(mutant<br>greater) | LDL-C<br>(wild<br>greater) | LDL-C<br>(mutant<br>greater) | HDL-C<br>(wild<br>greater) | HDL-C<br>(mutant<br>greater) |  |  |
| rs1433099   | chr19:g.11242658T>C  | 21/234                    | 0.807                   | 0.193                     | 0.977                   | <b>0.023</b>              | 0.981                      | <b>0.019</b>                 | 0.517                      | 0.483                        |  |  |
| rs14158     | chr19:g.11242044G>A  | 94/161                    | 0.686                   | 0.314                     | 0.995                   | <b>0.005</b>              | 0.992                      | <b>0.008</b>                 | 0.844                      | 0.156                        |  |  |
| rs2738466   | chr19:g.11242765A>G  | 94/161                    | 0.686                   | 0.314                     | 0.995                   | <b>0.005</b>              | 0.992                      | <b>0.008</b>                 | 0.844                      | 0.156                        |  |  |
| rs5742911   | chr19:g.11243445A>G  | 94/161                    | 0.686                   | 0.314                     | 0.995                   | <b>0.005</b>              | 0.992                      | <b>0.008</b>                 | 0.844                      | 0.156                        |  |  |
| rs17249057  | chr19:g.11243502T>C  | 94/161                    | 0.686                   | 0.314                     | 0.995                   | <b>0.005</b>              | 0.992                      | <b>0.008</b>                 | 0.844                      | 0.156                        |  |  |
| rs2738467   | chr19:g.11243735C>T  | 182/73                    | 0.467                   | 0.533                     | 0.401                   | 0.599                     | 0.509                      | 0.491                        | 0.727                      | 0.273                        |  |  |
| rs55971831  | chr19:g.11243411C>A  | 188/67                    | 0.998                   | <b>0.002</b>              | 0.386                   | 0.614                     | 0.264                      | 0.736                        | 0.025                      | 0.975                        |  |  |
| rs751672818 | chr19:g.11243411delC | 246/9                     | 0.181                   | 0.819                     | 0.331                   | 0.669                     | 0.333                      | 0.667                        | 0.658                      | 0.342                        |  |  |
| rs7254521   | chr19:g.11243422C>T  | 253/2                     | 0.17                    | 0.83                      | 0.231                   | 0.769                     | 0.165                      | 0.835                        | 0.847                      | 0.153                        |  |  |
| rs566918949 | chr19:g.11243467G>A  | 253/2                     | 0.422                   | 0.578                     | 0.692                   | 0.308                     | 0.803                      | 0.197                        | 0.401                      | 0.599                        |  |  |
| rs568219285 | chr19:g.11242719G>A  | 254/1                     | 0.958                   | <b>0.042</b>              | 0.955                   | <b>0.045</b>              | 0.514                      | 0.486                        | 0.061                      | 0.939                        |  |  |

261 Note: Serum lipid levels at enrollment were compared by the Wilcoxon rank sum test. Values in bold are statistically significant ( $P < 0.05$ ). The  $P$   
 262 values listed in the table represent the null hypothesis, while the remarks in parentheses are indicative of the alternative hypothesis.



Table 3 Associations between LDLR polymorphisms and the percentage changes in serum lipid levels after atorvastatin therapy

| rsID        | gDNA_coordinate      | wild/mutant<br>(patients) | Δ%TG<br>(wild<br>greater) | Δ%TG<br>(mutant<br>greater) | Δ%TC<br>(wild<br>greater) | Δ%TC<br>(mutant<br>greater) | <i>P</i>                      |                                 |                               |                                 |
|-------------|----------------------|---------------------------|---------------------------|-----------------------------|---------------------------|-----------------------------|-------------------------------|---------------------------------|-------------------------------|---------------------------------|
|             |                      |                           |                           |                             |                           |                             | Δ%LDL-<br>C (wild<br>greater) | Δ%LDL-<br>C (mutant<br>greater) | Δ%HDL-<br>C (wild<br>greater) | Δ%HDL-<br>C (mutant<br>greater) |
| rs1433099   | chr19:g.11242658T>C  | 21/234                    | 0.461                     | 0.539                       | 0.571                     | 0.429                       | 0.514                         | 0.486                           | <b>0.02</b>                   | 0.98                            |
| rs14158     | chr19:g.11242044G>A  | 94/161                    | 0.707                     | 0.293                       | 0.876                     | 0.124                       | 0.851                         | 0.149                           | 0.639                         | 0.361                           |
| rs2738466   | chr19:g.11242765A>G  | 94/161                    | 0.707                     | 0.293                       | 0.876                     | 0.124                       | 0.851                         | 0.149                           | 0.639                         | 0.361                           |
| rs5742911   | chr19:g.11243445A>G  | 94/161                    | 0.707                     | 0.293                       | 0.876                     | 0.124                       | 0.851                         | 0.149                           | 0.639                         | 0.361                           |
| rs17249057  | chr19:g.11243502T>C  | 94/161                    | 0.707                     | 0.293                       | 0.876                     | 0.124                       | 0.851                         | 0.149                           | 0.639                         | 0.361                           |
| rs2738467   | chr19:g.11243735C>T  | 182/73                    | 0.309                     | 0.691                       | <b>0.024</b>              | 0.976                       | <b>0.035</b>                  | 0.965                           | <b>0.002</b>                  | 0.998                           |
| rs55971831  | chr19:g.11243411C>A  | 188/67                    | 0.176                     | 0.824                       | 0.712                     | 0.288                       | 0.862                         | 0.138                           | 0.496                         | 0.504                           |
| rs751672818 | chr19:g.11243411delC | 246/9                     | 0.645                     | 0.355                       | 0.676                     | 0.324                       | 0.337                         | 0.663                           | 0.984                         | 0.016                           |
| rs7254521   | chr19:g.11243422C>T  | 253/2                     | 0.5                       | 0.5                         | 0.818                     | 0.182                       | 0.969                         | <b>0.031</b>                    | 0.682                         | 0.318                           |
| rs566918949 | chr19:g.11243467G>A  | 253/2                     | 0.286                     | 0.714                       | 0.238                     | 0.762                       | 0.261                         | 0.739                           | 0.122                         | 0.878                           |
| rs568219285 | chr19:g.11242719G>A  | 254/1                     | 0.05                      | 0.95                        | 0.157                     | 0.843                       | 0.876                         | 0.124                           | 0.942                         | 0.058                           |

268 Note: The relative changes in serum lipid levels after atorvastatin therapy were compared by the Wilcoxon rank sum test. Values in bold are  
 269 statistically significant ( $P < 0.05$ ). The  $P$  values listed in the table represent the null hypothesis, while the remarks in parentheses are indicative of  
 270 the alternative hypothesis. Δ%TG=100\*(TGpostintervention-TGenrollment)/TGenrollment; Δ%TC=100\*(TCpostintervention-  
 271 TCenrollment)/TCenrollment; Δ%LDL-C=100\*(LDL-Cpostintervention-LDL-Cenrollment)/LDL-Cenrollment; Δ%HDL-C=100\*(HDL-  
 272 Cpostintervention-HDL-Cenrollment)/HDL-Cenrollment.

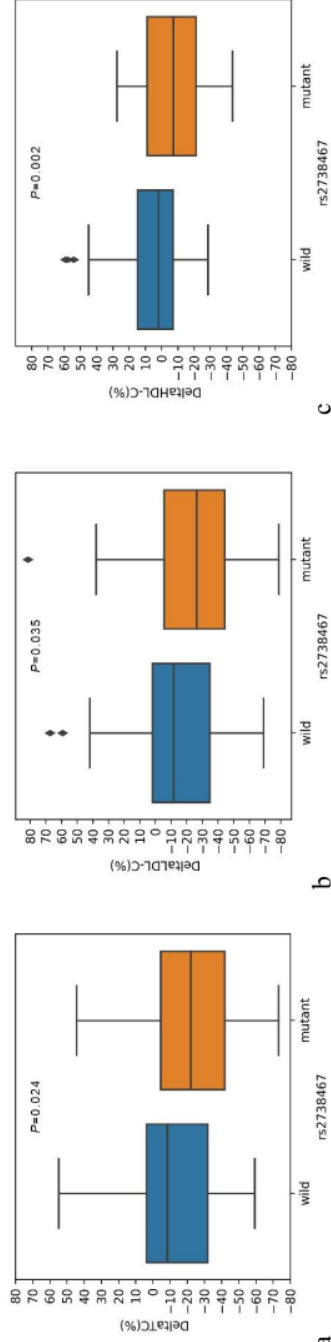

273 a

b

c

274 **Figure 4 The relative changes in lipid levels in patients with different genotypes at locus rs2738467 after atorvastatin therapy**

275 a:  $\Delta TC (\%) = 100 * (TC_{postintervention} - TC_{enrollment}) / TC_{enrollment}$ ; b:  $\Delta LDL-C (\%) = 100 * (LDL-C_{postintervention} - LDL-$

276  $C_{enrollment}) / LDL-C_{enrollment}$ ; c:  $\Delta HDL-C (\%) = 100 * (HDL-C_{postintervention} - HDL-C_{enrollment}) / HDL-C_{enrollment}$

277 **Discussion**

278 This study not only provided a comprehensive analysis of the correlation between  
279 polymorphisms in the LDLR 3' UTR and baseline serum lipid levels, but also  
280 revealed an association between these polymorphisms and the therapeutic efficacy of  
281 atorvastatin in a cohort of adult Chinese Han patients with dyslipidemia. The  
282 identification of 11 polymorphisms in the LDLR 3' UTR of these patients underscored  
283 the genetic diversity within this population and highlighted the potential of these  
284 polymorphisms to serve as biomarkers for the treatment of dyslipidemia.

285 The polymorphisms rs14158, rs2738466, rs5742911, and rs17249057 which were  
286 in strong linkage disequilibrium, were significantly correlated with baseline serum  
287 lipid levels. Patients with the AGGC haplotype had higher LDL-C levels at baseline.  
288 Although an investigation within a southern Chinese population has not established a  
289 correlation between polymorphisms rs14158 and rs2738466 and the incidence of  
290 coronary heart disease [45], data from a black South African cohort indicated that  
291 carriers of the rs14158 A allele have elevated LDL-C levels, increasing the risk for FH  
292 [46]. In addition, research conducted in a Spanish population revealed that subjects  
293 with hypercholesterolemia harboring the rs14158 A allele and the rs2738466 G allele  
294 exhibit a diminished response to the lipid-modulating agent Armolipid Plus,  
295 suggesting that these specific SNPs may exacerbate hypercholesterolemia  
296 susceptibility [47]. Furthermore, according to a Mexican study, the rs14158 A allele  
297 and the rs2738466 G allele were associated with an increased risk of acute coronary  
298 syndrome and concomitantly lower HDL-C levels [48]. Additionally, rs5742911 was  
299 potentially associated with FH by disrupting interactions with miRNAs and altering  
300 gene expression in a recent Dutch study [40]. Collectively, these findings underscore

301 the potential for the rs14158, rs2738466, rs5742911, and rs17249057 polymorphisms  
302 to influence cholesterol metabolism in various ways between distinct populations.

303 In this study, polymorphisms rs14158, rs2738466, rs5742911, and rs17249057 were  
304 not correlated with the therapeutic efficacy of atorvastatin. This finding was  
305 consistent with a study in Brazilian cohorts in which the allelic polymorphism  
306 rs14158G had no discernible influence on the therapeutic efficacy of atorvastatin [49].  
307 However, a study in the United States showed that rs5742911 was associated with  
308 poor simvastatin response in black patients but not in white patients [50].

309 The rs2738467 T allele was associated with a more pronounced <sup>4</sup>reduction in LDL-  
310 C levels after atorvastatin therapy but was not associated with baseline lipid levels.

311 This finding suggests a potential role for this polymorphism in improving the efficacy  
312 of atorvastatin. This finding supports the precision medicine approach, which  
313 emphasizes customizing treatment plans according to individual genetic profiles.

314 The allele frequencies of the identified polymorphisms in this study were consistent  
315 with them in East Asian populations as documented in public genomic databases. This  
316 reinforces the validity of the findings and suggests a genetic predisposition among the  
317 Chinese population to these specific LDLR polymorphisms. The findings in this study  
318 have profound implications for population-specific genetic screening and therapeutic  
319 interventions.

#### 320 **Study strengths and limitations**

321 This research presents several strengths, notably its investigation into the effects of  
322 LDLR 3' UTR polymorphisms on lipid levels both pre- and post-atorvastatin therapy  
323 in a population of adult Chinese Han individuals with dyslipidemia. The study  
324 provides valuable insights into the genetic factors that regulate serum lipids and how  
325 the factors impact the efficacy of atorvastatin treatment. This study not only supports

326 the stratification of potential dyslipidemia cases for targeted screening but also aids in  
327 pinpointing individuals most likely to benefit from atorvastatin therapy. As a result,  
328 this work lays a foundation for the implementation of personalized, precision  
329 medicine in clinical settings.

330 This study still has several limitations. Firstly, focusing exclusively on adult  
331 Chinese Han patients with dyslipidemia might restrict the applicability of the findings  
332 to other ethnicities or demographics. Secondly, the infrequent presence of certain  
333 polymorphisms, like rs568219285, necessitates further exploration in more extensive  
334 and varied populations to verify their links to lipid profiles and medication effects.  
335 Lastly, while this study concentrated on the relationship between LDLR  
336 polymorphisms and lipid levels alterations post-atorvastatin treatment, other  
337 contributory factors and underlying mechanisms remain unexamined.

### 338 **Conclusions**

339 In conclusion, this investigation has uncovered a significant link between LDLR gene  
340 3' UTR polymorphisms and lipid levels, as well as their impact on atorvastatin  
341 response. These insights open new pathways for advanced studies and clinical  
342 applications, highlighting the importance of genetic profiling in tailoring treatment for  
343 dyslipidemia. By adopting a personalized approach to therapy, it can enhance  
344 treatment precision and effectiveness, ultimately alleviating the cardiovascular disease  
345 burden associated with dyslipidemia.

346

### 347 **List of abbreviations**

|                   |                                        |
|-------------------|----------------------------------------|
| <b>4</b><br>ASCVD | Atherosclerotic cardiovascular disease |
| LDLR              | Low-density lipoprotein receptor       |
| FH                | Familial hypercholesterolemia          |

|       |                                      |
|-------|--------------------------------------|
| UTR   | Untranslated regions                 |
| TG    | Triglyceride                         |
| TC    | Total cholesterol                    |
| LDL-C | Low-density lipoprotein cholesterol  |
| HDL-C | High-density lipoprotein cholesterol |

348

349 **Supplementary Information**

350 Not applicable.

351 **Declarations**

352 **Ethics approval and consent to participate**

353 This study was approved by the Ethics Committee of Xiangya Hospital Central South  
354 University (ethics number K22144) and The First Hospital of Hebei Medical  
355 University (ethics number 20220418), and <sup>2</sup> all participants provided written informed  
356 consent.

357 **Consent for publication**

358 Written informed consent for publication was obtained from all participants.

359 **Availability of data and materials**

360 The datasets featured in this article are not openly accessible due to restrictions on the  
361 public dissemination of genomic information imposed by <sup>6</sup> the Institutional Ethics  
362 Committee. To access the datasets, requests should be made to the corresponding  
363 authors.

364 **Competing interests**

365 The authors declare no competing interests.

366 **Funding**

367 This study was supported by the project named Research on Precision Medication for

368 Chronic Diseases Based on Pharmacogenomics (2019YJY0203).

369 **Authors' contributions**

370 HL.Z. designed the study and carried out all the experiments. Y.Y. was primarily  
371 responsible for the experimental design. Y.T. analyzed the data and wrote the  
372 manuscript. G.Q.Z prepared the figures and tables. N.L.S., S.N.H. and G.L. designed  
373 the research and critically revised the manuscript. L.Y.W., Y.Q.A., C.S., M.X.Y.,  
374 Y.H.Z., Q.L. and Y.W.Z. made modifications to the manuscript. All authors reviewed  
375 the manuscript.

376 **Acknowledgments**

377 We would like to acknowledge the participants who provided valuable clinical  
378 samples for this study. We express sincere appreciation to the State Key Laboratory of  
379 Microbial Resources at the Institute of Microbiology, Chinese Academy of Sciences,  
380 for their generous provision of the essential facilities and resources required for this  
381 study.

382 **References**

- 383 1. Liu X, Yu S, Mao Z, Li Y, Zhang H, Yang K, et al. Dyslipidemia prevalence,  
384 awareness, treatment, control, and risk factors in Chinese rural population: the  
385 Henan rural cohort study. *Lipids Health Dis.* 2018;17(1):119.
- 386 2. Lu Y, Zhang H, Lu J, Ding Q, Li X, Wang X, et al. Prevalence of Dyslipidemia  
387 and Availability of Lipid-Lowering Medications Among Primary Health Care  
388 Settings in China. *JAMA Network Open.* 2021;4(9).
- 389 3. Yang M, Zhang Y, Ren J. Autophagic Regulation of Lipid Homeostasis in  
390 Cardiometabolic Syndrome. *Frontiers in Cardiovascular Medicine.* 2018;5(38).
- 391 4. Zhang Y, Whaley-Connell AT, Sowers JR, Ren J. Autophagy as an emerging

392 target in cardiorenal metabolic disease: From pathophysiology to management.  
393 Pharmacol Ther. 2018;191:1-22.

394 5. Zhang Y, Sowers JR, Ren J. Targeting autophagy in obesity: from  
395 pathophysiology to management. Nat Rev Endocrinol. 2018;14(6):356-76.

396 6. Ren J, Sowers JR, Zhang Y. Metabolic Stress, Autophagy, and Cardiovascular  
397 Aging: from Pathophysiology to Therapeutics. Trends Endocrinol Metab.  
398 2018;29(10):699-711.

399 7. Rogozik J, Głowczyńska R, Grabowski M. Genetic backgrounds and diagnosis  
400 of familial hypercholesterolemia. Clinical Genetics. 2023;105(1):3-12.

401 8. Ma LY, Chen WW, Gao RL, Liu LS, Zhu ML, Wang YJ, et al. China  
402 cardiovascular diseases report 2018: an updated summary. J Geriatr Cardiol.  
403 2020;17(1):1-8.

404 9. Ference BA, Ginsberg HN, Graham I, Ray KK, Packard CJ, Bruckert E, et al.  
405 Low-density lipoproteins cause atherosclerotic cardiovascular disease. 1.  
406 Evidence from genetic, epidemiologic, and clinical studies. A consensus  
407 statement from the European Atherosclerosis Society Consensus Panel. Eur  
408 Heart J. 2017;38(32):2459-72.

409 10. Mangione CM, Barry MJ, Nicholson WK, Cabana M, Chelmow D, Coker TR,  
410 et al. Statin Use for the Primary Prevention of Cardiovascular Disease in Adults.  
411 Jama. 2022;328(8).

412 11. Ferraro RA, Leucker T, Martin SS, Banach M, Jones SR, Toth PP.



413 Contemporary Management of Dyslipidemia. *Drugs*. 2022;82(5):559-76.

414 12. Li J-J, Zhao S-P, Zhao D, Lu G-P, Peng D-Q, Liu J, et al. 2023 Chinese  
415 guideline for lipid management. *Front Pharmacol*. 2023;14.

416 13. Polisecki E, Muallem H, Maeda N, Peter I, Robertson M, McMahon AD, et al.  
417 Genetic variation at the LDL receptor and HMG-CoA reductase gene loci, lipid  
418 levels, statin response, and cardiovascular disease incidence in PROSPER.  
419 *Atherosclerosis*. 2008;200(1):109-14.

420 14. Weedon MN, Linsel-Nitschke P, Götz A, Erdmann J, Braenne I, Braund P, et  
421 al. Lifelong Reduction of LDL-Cholesterol Related to a Common Variant in the  
422 LDL-Receptor Gene Decreases the Risk of Coronary Artery Disease—A  
423 Mendelian Randomisation Study. *PLoS ONE*. 2008;3(8).

424 15. Kathiresan S, Melander O, Anevski D, Guiducci C, Burt NP, Roos C, et al.  
425 Polymorphisms associated with cholesterol and risk of cardiovascular events. *N*  
426 *Engl J Med*. 2008;358(12):1240-9.

427 16. Sun XM, Patel DD, Webb JC, Knight BL, Fan LM, Cai HJ, et al. Familial  
428 hypercholesterolemia in China. Identification of mutations in the LDL-receptor  
429 gene that result in a receptor-negative phenotype. *Arterioscler Thromb*.  
430 1994;14(1):85-94.

431 17. Pimstone SN, Sun XM, du Souich C, Frohlich JJ, Hayden MR, Soutar AK.  
432 Phenotypic variation in heterozygous familial hypercholesterolemia: a  
433 comparison of Chinese patients with the same or similar mutations in the LDL

434 receptor gene in China or Canada. *Arterioscler Thromb Vasc Biol.*  
435 1998;18(2):309-15.

436 18. Wang D, Wu B, Li Y, Heng W, Zhong H, Mu Y, et al. A Chinese homozygote  
437 of familial hypercholesterolemia: identification of a novel C263R mutation in the  
438 LDL receptor gene. *J Hum Genet.* 2001;46(3):152-4.

439 19. Punzalan FE, Sy RG, Santos RS, Cutiongco EM, Gosiengfiao S, Fadriguilan E,  
440 et al. Low density lipoprotein--receptor (LDL-R) gene mutations among Filipinos  
441 with familial hypercholesterolemia. *J Atheroscler Thromb.* 2005;12(5):276-83.

442 20. Xie L, Gong QH, Xie ZG, Liang ZM, Hu ZM, Xia K, et al. Two novel mutations  
443 of the LDL receptor gene associated with familial hypercholesterolemia in a  
444 Chinese family. *Chin Med J (Engl).* 2007;120(19):1694-9.

445 21. Cheng X, Ding J, Zheng F, Zhou X, Xiong C. Two mutations in LDLR gene  
446 were found in two Chinese families with familial hypercholesterolemia. *Mol Biol*  
447 *Rep.* 2009;36(8):2053-7.

448 22. Wang L, Lin J, Liu S, Cao S, Liu J, Yong Q, et al. Mutations in the LDL receptor  
449 gene in four Chinese homozygous familial hypercholesterolemia phenotype  
450 patients. *Nutr Metab Cardiovasc Dis.* 2009;19(6):391-400.

451 23. De Castro-Orós I, Pampín S, Bolado-Carrancio A, De Cubas A, Palacios L,  
452 Plana N, et al. Functional analysis of LDLR promoter and 5' UTR mutations in  
453 subjects with clinical diagnosis of familial hypercholesterolemia. *Hum Mutat.*  
454 2011;32(8):868-72.

- 455 24. Yao RE, Wang J, Geng J, Zheng Z, Yu T, Yu Y, et al. Identification of LDLR  
456 mutations in two Chinese pedigrees with familial hypercholesterolemia. *J Pediatr*  
457 *Endocrinol Metab.* 2012;25(7-8):769-73.
- 458 25. Li H, Zhang Y, Wei X, Peng Y, Yang P, Tan H, et al. Rare intracranial  
459 cholesterol deposition and a homozygous mutation of LDLR in a familial  
460 hypercholesterolemia patient. *Gene.* 2015;569(2):313-7.
- 461 26. Santos PC, Pereira AC. Type of LDLR mutation and the pharmacogenetics of  
462 familial hypercholesterolemia treatment. *Pharmacogenomics.* 2015;16(15):1743-  
463 50.
- 464 27. Ohta N, Hori M, Takahashi A, Ogura M, Makino H, Tamanaha T, et al.  
465 Proprotein convertase subtilisin/kexin 9 V4I variant with LDLR mutations  
466 modifies the phenotype of familial hypercholesterolemia. *J Clin Lipidol.*  
467 2016;10(3):547-55.
- 468 28. Climent E, Pérez-Calahorra S, Marco-Benedí V, Plana N, Sánchez R, Ros E, et  
469 al. Effect of LDL cholesterol, statins and presence of mutations on the prevalence  
470 of type 2 diabetes in heterozygous familial hypercholesterolemia. *Sci Rep.*  
471 2017;7(1):5596.
- 472 29. Shu H, Chi J, Li J, Zhang W, Lv W, Wang J, et al. A novel indel variant in LDLR  
473 responsible for familial hypercholesterolemia in a Chinese family. *PLoS One.*  
474 2017;12(12).
- 475 30. Girona J, Rodríguez-Borjabad C, Ibarretxe D, Heras M, Amigo N, Feliu A, et

476 al. Plasma inducible degrader of the LDLR, soluble low-density lipoprotein  
477 receptor, and proprotein convertase subtilisin/kexin type 9 levels as potential  
478 biomarkers of familial hypercholesterolemia in children. *J Clin Lipidol.*  
479 2018;12(1):211-8.

480 31. Hoffman S, Adeli K. LDL Receptor Gene-Ablated Hamsters: A Rodent Model  
481 of Familial Hypercholesterolemia with Dominant Inheritance and Diet-Induced  
482 Coronary Atherosclerosis. *EBioMedicine.* 2018;28:17-8.

483 32. Rodríguez-Nóvoa S, Rodríguez-Jiménez C, Alonso C, Rodríguez-Laguna L,  
484 Gordo G, Martínez-Glez V, et al. Familial hypercholesterolemia: A single-  
485 nucleotide variant (SNV) in mosaic at the low density lipoprotein receptor  
486 (LDLR). *Atherosclerosis.* 2020;311:37-43.

487 33. Zhimin W, Hui W, Fengtao J, Wenjuan S, Yongrong L. Clinical and serum  
488 lipid profiles and LDLR genetic analysis of xanthelasma palpebrarum with  
489 nonfamilial hypercholesterolemia. *J Cosmet Dermatol.* 2020;19(11):3096-9.

490 34. Doi T, Hori M, Harada-Shiba M, Kataoka Y, Onozuka D, Nishimura K, et al.  
491 Patients With LDLR and PCSK9 Gene Variants Experienced Higher Incidence of  
492 Cardiovascular Outcomes in Heterozygous Familial Hypercholesterolemia. *J Am*  
493 *Heart Assoc.* 2021;10(4).

494 35. Hu H, Chen R, Hu Y, Wang J, Lin S, Chen X. The LDLR c.501C>A is a disease-  
495 causing variant in familial hypercholesterolemia. *Lipids Health Dis.*  
496 2021;20(1):101.

497 36. Meshkov A, Ershova A, Kiseleva A, Zotova E, Sotnikova E, Petukhova A, et al.  
498 The LDLR, APOB, and PCSK9 Variants of Index Patients with Familial  
499 Hypercholesterolemia in Russia. *Genes*. 2021;12(1).

500 37. Roy G, Couture P, Genest J, Ruel I, Baass A, Bergeron J, et al. Influence of the  
501 LDL-Receptor Genotype on Statin Response in Heterozygous Familial  
502 Hypercholesterolemia: Insights From the Canadian FH Registry. *Can J Cardiol*.  
503 2022;38(3):311-9.

504 38. Lin S, Hu T, Wang K, Wang J, Zhu Y, Chen X. In vitro assessment of the  
505 pathogenicity of the LDLR c.2160delC variant in familial hypercholesterolemia.  
506 *Lipids Health Dis*. 2023;22(1):77.

507 39. Lv X, Wang C, Liu L, Yin G, Zhang W, Abdu FA, et al. Screening and verifying  
508 the mutations in the LDLR and APOB genes in a Chinese family with familial  
509 hypercholesterolemia. *Lipids Health Dis*. 2023;22(1):175.

510 40. de Freitas RCC, Bortolin RH, Borges JB, de Oliveira VF, Dagli-Hernandez C,  
511 Marçal EdSR, et al. LDLR and PCSK9 3'UTR variants and their putative effects on  
512 microRNA molecular interactions in familial hypercholesterolemia: a  
513 computational approach. *Mol Biol Rep*. 2023;50:9165–77.

514 41. Bolger AM, Lohse M, Usadel B. Trimmomatic: a flexible trimmer for Illumina  
515 sequence data. *Bioinformatics*. 2014;30(15):2114-20.

516 42. Li H, Durbin R. Fast and accurate long-read alignment with Burrows-  
517 Wheeler transform. *Bioinformatics*. 2010;26(5):589-95.

- 518 43. McKenna A, Hanna M, Banks E, Sivachenko A, Cibulskis K, Kernytzky A, et al.  
519 The Genome Analysis Toolkit: a MapReduce framework for analyzing next -  
520 generation DNA sequencing data. *Genome Res.* 2010;20(9):1297-303.
- 521 44. Barrett JC. Haploview: Visualization and analysis of SNP genotype data. *Cold*  
522 *Spring Harb Protoc.* 2009;4(10).
- 523 45. Chen W, Wang S, Ma Y, Zhou Y, Liu H, Strnad P, et al. Analysis of  
524 polymorphisms in the 3' untranslated region of the LDL receptor gene and their  
525 effect on plasma cholesterol levels and drug response. *Int J Mol Med.*  
526 2008;21(3):345-53.
- 527 46. van Zyl T, Jerling JC, Conradie KR, Feskens EJM. Common and rare single  
528 nucleotide polymorphisms in the LDLR gene are present in a black South African  
529 population and associate with low-density lipoprotein cholesterol levels. *J Hum*  
530 *Genet.* 2013;59(2):88-94.
- 531 47. Vinci MC, De Castro-Orós I, Solà R, Valls RM, Brea A, Mozas P, et al. Genetic  
532 Variants of LDLR and PCSK9 Associated with Variations in Response to  
533 Antihypercholesterolemic Effects of Armolipid Plus with Berberine. *Plos One.*  
534 2016;11(3).
- 535 48. Vargas-Alarcon G, Perez-Mendez O, Ramirez-Bello J, Posadas-Sanchez R,  
536 Gonzalez-Pacheco H, Escobedo G, et al. The c.\*52 A/G and c.\*773 A/G Genetic  
537 Variants in the UTR'3 of the LDLR Gene Are Associated with the Risk of Acute  
538 Coronary Syndrome and Lower Plasma HDL-Cholesterol Concentration.

539 Biomolecules. 2020;10(10).  
540 49. Zambrano T, Hirata MH, Cerda Á, Dorea EL, Pinto GA, Gusukuma MC, et al.  
541 Impact of 3'UTR genetic variants in PCSK9 and LDLR genes on plasma lipid traits  
542 and response to atorvastatin in Brazilian subjects: a pilot study. Int J Clin Exp  
543 Med. 2015;8(4):5978-88.  
544 50. Mangravite LM, Medina MW, Cui J, Pressman S, Smith JD, Rieder MJ, et al.  
545 Combined influence of LDLR and HMGCR sequence variation on lipid-lowering  
546 response to simvastatin. Arterioscler Thromb Vasc Biol. 2010;30(7):1485-92.

# Impact of LDLR Polymorphisms on Lipid Levels and Atorvastatin Efficacy in a Northern Chinese Adult Han Cohort with Dyslipidemia

ORIGINALITY REPORT

6%

SIMILARITY INDEX

## PRIMARY SOURCES

|   |                                                                                                                                                                                                                                                 |               |
|---|-------------------------------------------------------------------------------------------------------------------------------------------------------------------------------------------------------------------------------------------------|---------------|
| 1 | <a href="http://www.dovepress.com">www.dovepress.com</a><br>Internet                                                                                                                                                                            | 67 words — 1% |
| 2 | <a href="http://www.researchsquare.com">www.researchsquare.com</a><br>Internet                                                                                                                                                                  | 54 words — 1% |
| 3 | <a href="http://lipidworld.biomedcentral.com">lipidworld.biomedcentral.com</a><br>Internet                                                                                                                                                      | 45 words — 1% |
| 4 | <a href="http://www.frontiersin.org">www.frontiersin.org</a><br>Internet                                                                                                                                                                        | 42 words — 1% |
| 5 | <a href="http://www.mdpi.com">www.mdpi.com</a><br>Internet                                                                                                                                                                                      | 28 words — 1% |
| 6 | Kaihan Wang, Tingting Hu, Mengmeng Tai, Yan Shen, Haocheng Chai, Shaoyi Lin, Xiaomin Chen. "LDLR c.415G>A causes familial hypercholesterolemia by weakening LDLR binding to LDL", Research Square Platform LLC, 2024<br>Crossref Posted Content | 25 words — 1% |
| 7 | Renata Caroline Costa de Freitas, Raul Hernandes Bortolin, Jessica Bassani Borges, Victor Fernandes de Oliveira et al. "LDLR and PCSK9 3'UTR variants and their                                                                                 | 25 words — 1% |



putative effects on microRNA molecular interactions in familial hypercholesterolemia: a computational approach", Molecular Biology Reports, 2023

Crossref

---

EXCLUDE QUOTES ON

EXCLUDE BIBLIOGRAPHY ON

EXCLUDE SOURCES

< 1%

EXCLUDE MATCHES

OFF
